# Supplementary material for: The Vitamin E Analog Gamma-Tocotrienol (GT3) and Statins Synergistically Up-Regulate Endothelial Thrombomodulin (TM)
Source: PubMed Central journal article supplement (PMC5133932; doi:10.3390/ijms17111937), 2016-11-18
Supplement: ijms-17-01937-s001.pdf [file ijms-17-01937-s001.pdf]

# Supplementary Materials: The Vitamin E Analog $\gamma$ -Tocotrienol (GT3) and Statins Synergistically Up-Regulate Endothelial Thrombomodulin (TM)

Rupak Pathak, Sanchita P. Ghosh, Daohong Zhou and Martin Hauer-Jensen

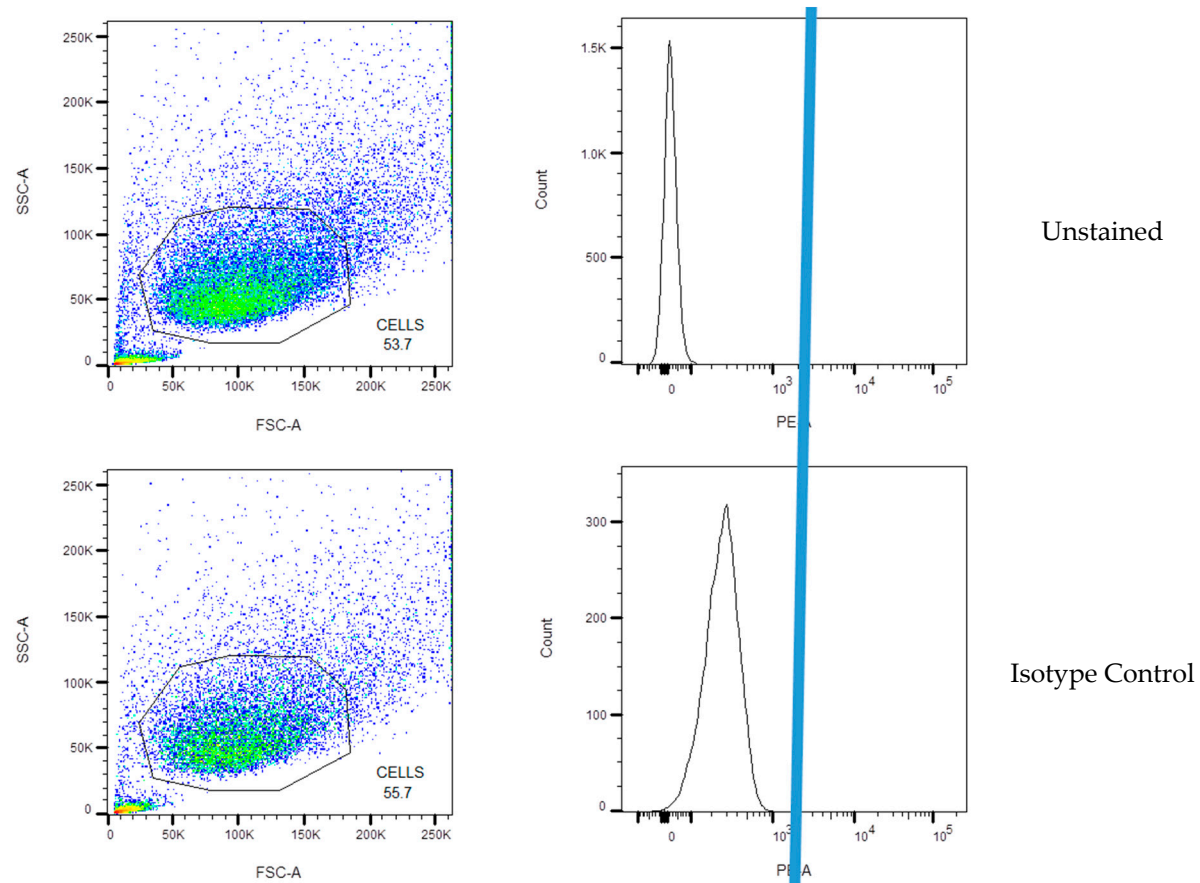

Figure S1. Cont.

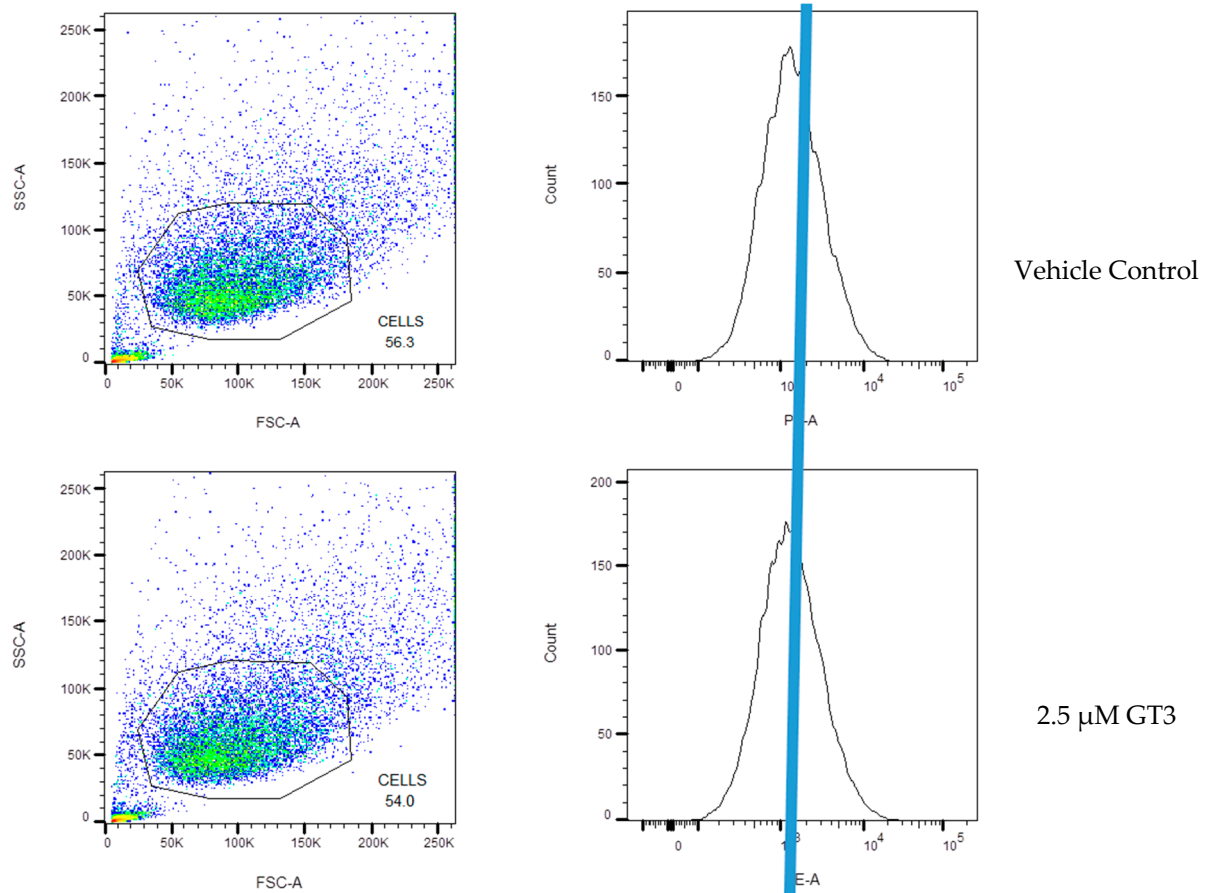

Figure S1. Cont.

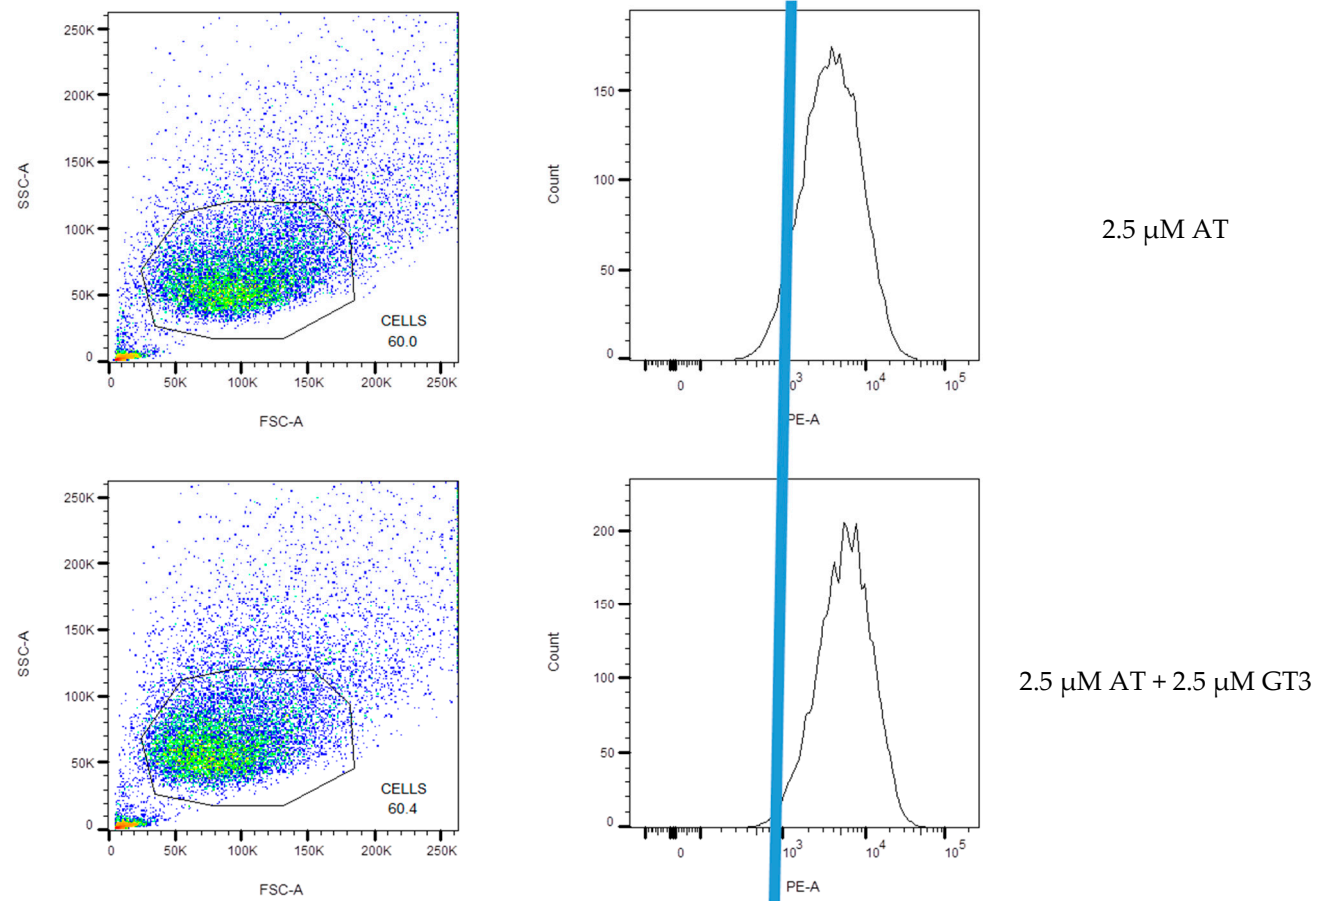

**Figure S1.** Combined effect of atorvastatin (AT) and  $\gamma$ -tocotrienol (GT3) on thrombomodulin (TM) expression. FSC-A, forward scattered area, SSC-A, side scattered area. Black circle representing the gated area.

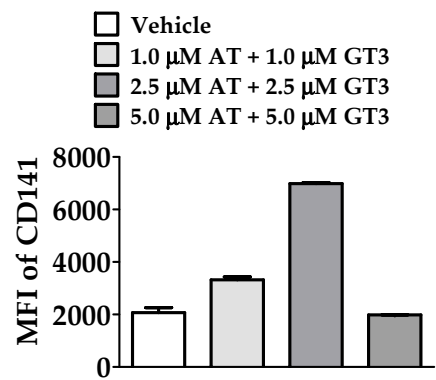

**Figure S2.** Synergistic effect of Atorvastatin and GT3 on TM expression.
